# Supplementary material for: Epidemiology of the Rhinovirus (RV) in African and Southeast Asian Children: A Case-Control Pneumonia Etiology Study
Source: MDPI journal article supplement (doi:10.3390/v13071249), 2021-06-27
Supplement: s1 [file s1]

**Table S1:** Demographic and Clinical Characteristics of Controls by Rhinovirus Infection Status for Each African Site.

| Characteristics                | Kenya (n=855) |             |                    | Gambia (n=624) |             |                      | Mali (n=724) |             |                    | Zambia (n=533) |             |                    | South Africa (n=823) |             |                    |
|--------------------------------|---------------|-------------|--------------------|----------------|-------------|----------------------|--------------|-------------|--------------------|----------------|-------------|--------------------|----------------------|-------------|--------------------|
|                                | RV+           | RV-         | P-                 | RV+            | RV-         | P-value <sup>a</sup> | RV+          | RV-         | P-                 | RV+            | RV-         | P-                 | RV+                  | RV-         | P-                 |
|                                | (n=162)       | (n=693)     | value <sup>a</sup> | (n=177)        | (n=447)     |                      | (n=143)      | (n=581)     | value <sup>a</sup> | (n=93)         | (n=440)     | value <sup>a</sup> | (n=194)              | (n=629)     | value <sup>a</sup> |
|                                | N (%)         | N (%)       |                    | N (%)          | N (%)       |                      | N (%)        | N (%)       |                    | N (%)          | N (%)       |                    | N (%)                | N (%)       |                    |
| <b>Demographic and health:</b> |               |             |                    |                |             |                      |              |             |                    |                |             |                    |                      |             |                    |
| Mean Age, months (SD)          | 14.8 (14.3)   | 17.3 (14.7) | 0.05               | 14.1 (13.5)    | 16.9 (14.7) | 0.03                 | 10.0 (9.6)   | 14.7 (13.5) | P<0.001            | 6.9 (6.2)      | 10.5 (11.3) | 0.01               | 11.3 (11.3)          | 12.6 (12.6) | 0.21               |
| Female                         | 85 (52)       | 319 (46)    | 0.16               | 75 (42)        | 220 (49)    | 0.12                 | 62 (43)      | 304 (52)    | 0.05               | 36 (39)        | 226 (51)    | 0.03               | 106 (55)             | 317 (50)    | 0.26               |
| Never breast fed               | 1 (1)         | 6 (1)       | 0.86               | 1 (1)          | 1 (0)       | 0.49                 | 0            | 3 (1)       | 0.84               | 2 (2)          | 13 (3)      | 0.62               | 66 (34)              | 222 (35)    | 0.79               |
| Under weight <sup>b</sup>      | 26 (16)       | 99 (14)     | 0.29               | 23 (13)        | 79 (18)     | 0.24                 | 18 (13)      | 61 (11)     | 0.26               | 9 (10)         | 56 (13)     | 0.74               | 10 (5)               | 27 (4)      | 0.60               |
| Day Care attendance            | 5 (3)         | 42 (6)      | 0.14               | 0              | 11 (2)      | 0.05                 | 107 (75)     | 445 (77)    | 0.66               | 0              | 15 (3)      | 0.17               | 28 (14)              | 93 (15)     | 0.98               |
| Smoker in household            | 43 (27)       | 214 (31)    | 0.27               | 99 (58)        | 248 (56)    | 0.70                 | 26 (18)      | 122 (21)    | 0.66               | 28 (30)        | 122 (27)    | 0.64               | 48 (30)              | 198 (32)    | 0.46               |
| Premature birth <sup>c</sup>   | 32 (20)       | 75 (11)     | 0.01               | 11 (6)         | 22 (5)      | 0.65                 | 5 (4)        | 7 (1)       | 0.05               | 3 (3)          | 28 (6)      | 0.23               | 66 (34)              | 184 (29)    | 0.17               |
| Birth weight, mean (SD)        | 3.1 (0.6)     | 3.1 (0.6)   | 0.50               | 3.1 (0.6)      | 2.9 (0.5)   | 0.17                 | 3.3 (0.6)    | 3.3 (0.7)   | 0.86               | 2.9 (0.4)      | 2.9 (0.5)   | 0.96               | 3.0 (0.6)            | 3.0 (0.5)   | 0.19               |
| <b>Clinical Features:</b>      |               |             |                    |                |             |                      |              |             |                    |                |             |                    |                      |             |                    |
| ARI <sup>d</sup>               | 50 (31)       | 160 (23)    | 0.05               | 52 (29)        | 104 (23)    | 0.12                 | 61 (43)      | 237 (41)    | 0.33               | 10 (10)        | 43 (10)     | 0.58               | 11 (6)               | 34 (5)      | 0.97               |
| Tachypnea <sup>e</sup>         | 31 (19)       | 103 (15)    | 0.25               | 23 (13)        | 58 (13)     | 0.94                 | 20 (14)      | 98 (17)     | 0.44               | 6 (6)          | 58 (13)     | 0.15               | 11 (6)               | 66 (11)     | 0.06               |
| Cough                          | 16 (10)       | 26 (4)      | 0.01               | 21 (12)        | 42 (9)      | 0.35                 | 12 (8)       | 48 (8)      | 0.95               | 7 (8)          | 29 (7)      | 0.47               | 5 (3)                | 10 (2)      | 0.40               |
| Fever <sup>f</sup>             | 8 (5)         | 25 (4)      | 0.37               | 25 (14)        | 59 (13)     | 0.73                 | 2 (1)        | 16 (3)      | 0.36               | 0              | 4 (1)       | 0.66               | 0                    | 5 (1)       | 0.41               |
| Diarrhoea                      | 2 (1)         | 14 (2)      | 0.51               | 6 (3)          | 18 (4)      | 0.75                 | 15 (3)       | 1 (1)       | 0.21               | 1 (1)          | 7 (2)       | 0.85               | 0                    | 2 (0)       | 0.57               |
| Rhinorrhoea                    | 39 (24)       | 119 (17)    | 0.04               | 25 (14)        | 45 (10)     | 0.16                 | 52 (36)      | 196 (34)    | 0.22               | 3 (3)          | 11 (3)      | 0.75               | 2 (1)                | 12 (2)      | 0.36               |

Abbreviations - SD: standard deviation; RV: rhinovirus; ARI: acute respiratory infection.

- P*-values comparing RV+ and RV- controls from regression models adjusted for age in months and site of enrollment and for confounding covariates where applicable. *P*-values could not be calculated for variables where both values are 0, thus cells left blank.
- Underweight defined as weight for age <-2SD of the median age-sex specific WHO reference.
- Premature birth defined as gestational age <37 weeks.
- Controls were considered to have ARI if they had 1) cough or runny nose, or 2) one of the following signs, ear discharge, wheeze, or difficulty breathing, in the presence of sore throat or fever (temperature ≥38.0°C or reported fever in the past 48 hours).
- Tachypnea defined as respiratory rate >60 breaths/minute if aged <2 months, respiratory rate >50 breaths/minute if aged 2-12 months, respiration rate >40 breaths/minute if aged >12 month.
- Fever defined as temperature >38°C.

**Table S2:** The Demographical and Clinical Characteristics of Controls by Rhinovirus Infection Status for Each Southeast Asian Site Individually.

| Characteristics                | Thailand (n=650)    |                      |                      | Bangladesh (n=768)   |                      |                      |
|--------------------------------|---------------------|----------------------|----------------------|----------------------|----------------------|----------------------|
|                                | RV+ (n=92)<br>N (%) | RV- (n=558)<br>N (%) | P-value <sup>a</sup> | RV+ (n=195)<br>N (%) | RV- (n=573)<br>N (%) | P-value <sup>a</sup> |
| <u>Demographic and health:</u> |                     |                      |                      |                      |                      |                      |
| Mean Age, months (SD)          | 20.7 (15.5)         | 21.1 (15.9)          | 0.82                 | 14.9 (13.6)          | 18.5 (16.3)          | 0.01                 |
| Female                         | 49 (53)             | 271 (49)             | 0.39                 | 102 (53)             | 300 (52)             | 0.92                 |
| Never breast fed               | 5 (5)               | 65 (12)              | 0.08                 | 2 (1)                | 2 (0)                | 0.23                 |
| Under weight <sup>b</sup>      | 4 (4)               | 33 (6)               | 0.52                 | 37 (19)              | 116 (20)             | 1.00                 |
| Day Care attendance            | 22 (24)             | 132 (24)             | 0.96                 | 1 (1)                | 1 (0)                | 0.61                 |
| Smoker in household            | 57 (62)             | 327 (59)             | 0.54                 | 81 (42)              | 287 (50)             | 0.05                 |
| Premature birth <sup>c</sup>   | 10 (11)             | 40 (7)               | 0.02                 | 3 (2)                | 20 (3)               | 0.36                 |
| Birth weight, mean (SD)        | 3.1 (0.4)           | 3.0 (0.5)            | 0.46                 | 2.9 (0.6)            | 2.9 (0.5)            | 0.96                 |
| <u>Clinical Features:</u>      |                     |                      |                      |                      |                      |                      |
| ARI <sup>d</sup>               | 60 (65)             | 190 (34)             | <0.001               | 56 (29)              | 113 (20)             | 0.02                 |
| Tachypnea <sup>e</sup>         | 2 (2)               | 46 (8)               | 0.07                 | 10 (5)               | 28 (5)               | 0.89                 |
| Cough                          | 27 (29)             | 81 (15)              | 0.01                 | 32 (16)              | 63 (11)              | 0.06                 |
| Fever <sup>f</sup>             | 13 (14)             | 73 (13)              | 0.83                 | 8 (4)                | 30 (5)               | 0.50                 |
| Diarrhoea                      | 2 (2)               | 16 (3)               | 0.78                 | 1 (1)                | 10 (2)               | 0.20                 |
| Rhinorrhoea                    | 59 (64)             | 175 (31)             | P<0.001              | 43 (22)              | 71 (12)              | 0.02                 |

Abbreviations - SD: standard deviation; RV: rhinovirus; ARI: acute respiratory infection.

- P-values comparing RV+ and RV- controls from regression models adjusted for age in months and site of enrollment and for confounding covariates where applicable.
- Underweight defined as weight for age <-2SD of the median age-sex specific WHO reference.
- Premature birth defined as gestational age <37 weeks.
- Controls were considered to have ARI if they had 1) cough or runny nose, or 2) one of the following signs, ear discharge, wheeze, or difficulty breathing, in the presence of sore throat or fever (temperature  $\geq 38.0^{\circ}\text{C}$  or reported fever in the past 48 hours).
- Tachypnea defined as respiratory rate >60 breaths/minute if aged <2 months, respiratory rate >50 breaths/minute if aged 2-12 months, respiration rate >40 breaths/minute if aged >12 month.
- Fever defined as temperature  $>38^{\circ}\text{C}$ .

**Table S3:** The Demographical and Clinical Characteristics of Cases by Rhinovirus Infection Status for Each African Site Individually.

| Characteristics                     | Kenya (n=628) |             |                    | Gambia (n=609) |             |                      | Mali (n=650) |             |                      | Zambia (n=449) |           |                      | South Africa (n=794) |           |                      |
|-------------------------------------|---------------|-------------|--------------------|----------------|-------------|----------------------|--------------|-------------|----------------------|----------------|-----------|----------------------|----------------------|-----------|----------------------|
|                                     | RV+           | RV-         | P-                 | RV+            | RV-         | P-value <sup>a</sup> | RV+          | RV-         | P-value <sup>a</sup> | RV+            | RV-       | P-value <sup>a</sup> | RV+                  | RV-       | P-value <sup>a</sup> |
|                                     | (n=152)       | (n=476)     | value <sup>a</sup> | (n=139)        | (n=470)     |                      | (n=112)      | (n=538)     |                      | (n=95)         | (n=354)   |                      | (n=182)              | (n=794)   |                      |
|                                     | N (%)         | N (%)       |                    | N (%)          | N (%)       |                      | N (%)        | N (%)       |                      | N (%)          | N (%)     |                      | N (%)                | N (%)     |                      |
| <u>Demographic and health:</u>      |               |             |                    |                |             |                      |              |             |                      |                |           |                      |                      |           |                      |
| Mean Age, months (SD)               | 14.5 (13.2)   | 14.2 (13.1) | 0.80               | 14.4 (12.5)    | 11.3 (11.2) | 0.01                 | 9.3 (10.1)   | 10.0 (10.2) | 0.53                 | 9.9 (10.9)     | 7.6 (8.9) | 0.04                 | 9.9 (9.7)            | 8.5 (9.5) | 0.08                 |
| Male                                | 60 (39)       | 201 (42)    | 0.52               | 55 (40)        | 176 (37)    | 0.97                 | 50 (45)      | 237 (44)    | 0.90                 | 47 (49)        | 158 (45)  | 0.44                 | 80 (44)              | 291 (48)  | 0.41                 |
| Never breast fed                    | 3 (2)         | 6 (1)       | 0.48               | 3 (2)          | 4 (1)       | 0.29                 | 7 (6)        | 25 (5)      | 0.38                 | 4 (4)          | 22 (6)    | 0.51                 | 52 (29)              | 211 (34)  | 0.15                 |
| Under weight <sup>c</sup>           | 60 (39)       | 190 (43)    | 0.81               | 41 (30)        | 119 (25)    | 0.90                 | 37 (33)      | 195 (36)    | 0.70                 | 34 (36)        | 87 (25)   | 0.05                 | 37 (20)              | 174 (28)  | 0.03                 |
| Day care attendance                 | 8 (5)         | 29 (6)      | 0.57               | 2 (1)          | 11 (2)      | 0.51                 | 83 (74)      | 350 (65)    | 0.17                 | 1 (1)          | 5 (1)     | 0.84                 | 24 (13)              | 92 (15)   | 0.38                 |
| Smoker in household                 | 1 (1)         | 10 (2)      | 0.24               | 79 (57)        | 251 (54)    | 0.57                 | 33 (30)      | 153 (28)    | 0.84                 | 27 (28)        | 61 (17)   | 0.05                 | 73 (40)              | 217 (35)  | 0.50                 |
| Premature birth <sup>d</sup>        | 28 (18)       | 87 (18)     | 0.62               | 5 (4)          | 19 (4)      | 0.94                 | 3 (3)        | 25 (5)      | 0.56                 | 2 (2)          | 21 (6)    | 0.28                 | 33 (18)              | 119 (19)  | 0.79                 |
| <u>Clinical features:</u>           |               |             |                    |                |             |                      |              |             |                      |                |           |                      |                      |           |                      |
| Very severe pneumonia               | 80 (53)       | 242 (51)    | 0.76               | 25 (18)        | 63 (13)     | 0.32                 | 65 (58)      | 273 (51)    | 0.15                 | 32 (34)        | 108 (31)  | 0.58                 | 65 (36)              | 189 (31)  | 0.21                 |
| Chest X-ray abnormal <sup>e</sup>   | 65 (43)       | 217 (46)    | 0.51               | 58 (42)        | 215 (46)    | 0.40                 | 34 (30)      | 205 (38)    | 0.15                 | 32 (34)        | 148 (42)  | 0.15                 | 85 (47)              | 344 (56)  | 0.02                 |
| Hypoxic <sup>f</sup>                | 48 (32)       | 136 (29)    | 0.32               | 7 (5)          | 36 (8)      | 0.28                 | 57 (51)      | 249 (46)    | 0.41                 | 29 (31)        | 133 (38)  | 0.26                 | 135 (75)             | 457 (75)  | 0.90                 |
| Tachycardia <sup>g</sup>            | 77 (51)       | 270 (57)    | 0.20               | 65 (47)        | 264 (56)    | 0.04                 | 69 (62)      | 300 (56)    | 0.31                 | 64 (67)        | 220 (63)  | 0.39                 | 87 (48)              | 299 (49)  | 0.84                 |
| Tachypnea <sup>h</sup>              | 115(76)       | 322 (68)    | 0.06               | 121 (87)       | 409 (87)    | 0.81                 | 101 (90)     | 450 (84)    | 0.06                 | 84 (88)        | 302 (86)  | 0.74                 | 150 (83)             | 459 (77)  | 0.10                 |
| Wheezing                            | 31 (21)       | 52 (11)     | 0.01               | 48 (35)        | 142 (30)    | 0.14                 | 27 (24)      | 87 (16)     | 0.07                 | 21 (22)        | 35 (10)   | 0.01                 | 79 (44)              | 188 (32)  | 0.01                 |
| Fever <sup>i</sup>                  | 119(78)       | 416 (87)    | 0.01               | 135 (97)       | 466 (99)    | 0.05                 | 95 (85)      | 472 (88)    | 0.53                 | 73 (77)        | 300 (85)  | 0.04                 | 116 (64)             | 382 (62)  | 0.94                 |
| Convulsions                         | 14 (9)        | 61 (13)     | 0.15               | 8 (6)          | 18 (4)      | 0.55                 | 11 (10)      | 73 (14)     | 0.37                 | 4 (4)          | 17 (5)    | 0.62                 | 5 (3)                | 5 (1)     | 0.05                 |
| Diarrhoea                           | 25 (16)       | 72 (15)     | 0.77               | 13 (9)         | 41 (9)      | 0.64                 | 25 (22)      | 140 (26)    | 0.47                 | 22 (23)        | 69 (19)   | 0.87                 | 30 (16)              | 89 (15)   | 0.40                 |
| Leucocytosis <sup>j</sup>           | 77 (52)       | 203 (43)    | 0.11               | 50 (48)        | 141 (41)    | 0.43                 | 28 (25)      | 156 (29)    | 0.57                 | 43 (46)        | 141 (41)  | 0.56                 | 93 (51)              | 260 (43)  | 0.07                 |
| CRP >40mg/l <sup>k</sup>            | 29 (19)       | 125 (26)    | 0.05               | 25 (18)        | 104 (22)    | 0.18                 | 30 (27)      | 159 (30)    | 0.76                 | 31 (33)        | 107 (30)  | 0.80                 | 38 (21)              | 161 (26)  | 0.07                 |
| Blood culture positive <sup>l</sup> | 3 (2)         | 9 (2)       | 0.80               | 4 (3)          | 23 (5)      | 0.21                 | 11 (10)      | 28 (5)      | 0.06                 | 6 (6)          | 22 (6)    | 1.0                  | 3 (2)                | 16 (3)    | 0.52                 |
| MCP <sup>m</sup>                    | 1 (1)         | 4 (1)       | 0.81               | 3 (2)          | 12 (3)      | 0.67                 | 4 (4)        | 14 (3)      | 0.51                 | 0              | 2 (1)     | 0.84                 | 0                    | 3 (0)     | 0.62                 |
| Hospital stay >3 days               | 25 (16)       | 106 (22)    | 0.16               | 10 (7)         | 45 (20)     | 0.45                 | 47 (42)      | 266 (49)    | 0.13                 | 38 (40)        | 131 (37)  | 0.47                 | 77 (42)              | 358 (59)  | <0.001               |
| Case fatality ratio                 | 9 (6)         | 27 (6)      | 0.79               | 7 (5)          | 14 (3)      | 0.33                 | 25 (23)      | 87 (17)     | 0.13                 | 14 (26)        | 55 (28)   | 0.78                 | 7 (5)                | 19 (4)    | 0.51                 |

Abbreviations - SD: standard deviation; RV: rhinovirus; CRP: C-reactive protein; MCP<sup>m</sup>: microbiologically confirmed pneumococcal pneumonia.

- a. All characteristics are expressed as n (%); unless otherwise stated in the table.
- b. *P*-values comparing RV+ and RV- cases from regression models adjusted for age in months and site of enrollment and for confounding covariates where applicable.
- c. Underweight defined as weight for age <-2SD of the median age-sex specific WHO reference.
- d. Premature birth defined as gestational age <37 weeks.
- e. Abnormal Chest X-ray defined as radiographically confirmed end point pneumonia consolidation or any infiltrates.
- f. A child was considered to be hypoxic if 1) a room air pulse-oximetry reading indicated oxygen saturation <90% at the two sites at elevation (Zambia and South Africa) or <92% at all other sites, or 2) a room air oxygen saturation.
- g. Tachycardia defined as heart rate >160 beats per minute (bpm) if aged <11 months, heart rate >150 bpm if aged 12-35 months, heart rate >140 bpm if aged 36-59 months.
- h. Tachypnea defined as respiratory rate >60 breaths/minute if aged <2 months, respiratory rate >50 breaths/minute if aged 2-12 months, respiration rate >40 breaths/minute if aged >12 month.
- i. Fever defined as temperature >38°C.
- j. Leucocytosis defined as white blood cell count >15 000 cells/uL if age <12 months, white blood cell count >13 000 cells/uL if age >12 months.
- k. CRP defined as levels ≥40mg/mL which are considered to potentially indicate bacterial infection.
- l. Blood culture positive for any non-contaminate bacteria.
- m. MCPP defined when *S. pneumoniae* was cultured from a normally sterile body fluid - blood, pleural fluid or lung aspirate - or pleural fluid or lung aspirate was PCR *LyfA* positive.

**Table S4:** The Demographical and Clinical Characteristics of Cases by Rhinovirus Infection Status for Each Southeast Asia Site Individually

| Each Southeast Asia Site Individually |                  |             |          |                    |             |          |
|---------------------------------------|------------------|-------------|----------|--------------------|-------------|----------|
| Characteristic, n(%)a                 | Thailand (n=221) |             |          | Bangladesh (n=525) |             | P-valueb |
|                                       | RV+ (n=40)       | RV- (n=181) | P-valueb | RV+ (n=192)        | RV- (n=333) |          |
|                                       | N (%)            | N (%)       |          | N (%)              | N (%)       |          |
| <u>Demographic and health:</u>        |                  |             |          |                    |             |          |
| Mean Age, months (SD)                 | 21.9 (15.1)      | 17.2 (12.9) | 0.05     | 16.0 (11.7)        | 13.9 (11.8) | 0.04     |
| Female                                | 15 (38)          | 73 (40)     | 0.71     | 66 (34)            | 125 (38)    | 0.42     |
| Never breast fed                      | 9 (23)           | 29 (16)     | 0.33     | 2 (1)              | 3 (1)       | 0.71     |
| Under weightc                         | 6 (15)           | 47 (26)     | 0.18     | 62 (32)            | 114 (34)    | 0.32     |
| Day care attendance                   | 7 (18)           | 20 (17)     | 0.89     | 1 (1)              | 0           | 0.32     |
| Smoker in household                   | 22 (55)          | 105 (58)    | 0.83     | 105 (55)           | 172 (52)    | 0.50     |
| Premature birthd                      | 7 (18)           | 37 (20)     | 0.50     | 9 (5)              | 21 (6)      | 0.47     |
| <u>Clinical Features:</u>             |                  |             |          |                    |             |          |
| Very severe pneumonia                 | 6 (15)           | 45 (25)     | 0.24     | 18 (9)             | 35 (11)     | 0.77     |
| Chest X-ray abnormale                 | 13 (33)          | 85 (47)     | 0.11     | 78 (41)            | 141 (42)    | 0.60     |
| Mechanical ventilation                | 6 (15)           | 47 (26)     | 0.20     | 15 (8)             | 28 (8)      | 0.68     |
| Hypoxicf                              | 17 (43)          | 81 (45)     | 0.81     | 60 (31)            | 80 (24)     | 0.15     |
| Tachycardiag                          | 32 (82)          | 135 (78)    | 0.55     | 182 (95)           | 307 (92)    | 0.42     |
| Tachypneah                            | 30 (75)          | 70 (39)     | <0.001   | 185 (96)           | 324 (97)    | 0.42     |
| Wheezing                              | 33 (83)          | 155 (86)    | 0.36     | 175 (91)           | 312 (94)    | 0.20     |
| Feveri                                | 0                | 23 (13)     | 0.08     | 1 (1)              | 4 (1)       | 0.45     |
| Convulsions                           | 3 (8)            | 39 (22)     | 0.06     | 0                  | 1 (0)       | 0.740    |
| Diarrhoea                             | 3 (8)            | 5 (3)       | 0.13     | 16 (8)             | 27 (8)      | 0.80     |
| Leucocytosisj                         | 28 (70)          | 89 (49)     | 0.04     | 124 (69)           | 145 (48)    | <0.001   |
| CRP >40mg/lk                          | 6 (15)           | 30 (17)     | 0.80     | 17 (9)             | 32 (10)     | 0.78     |
| Blood culture positivel               | 0                | 7 (4)       | 0.40     | 2 (1)              | 3 (1)       | 0.96     |
| MCPPlm                                | 0                | 0           |          | 0                  | 0           |          |
| Hospital stay >3 days                 | 4 (10)           | 76 (42)     | 0.01     | 38 (20)            | 70 (21)     | 0.93     |
| Case fatality ratio                   | 0                | 9 (5)       | 0.30     | 1 (1)              | 4 (1)       | 0.64     |

Abbreviations - RV: rhinovirus; SD: standard deviation; CRP: C-reactive protein; MCPP: microbiologically confirmed pneumococcal pneumonia.

- All characteristics are expressed as n (%); unless otherwise stated in the table.
- P-values comparing RV+ and RV- cases from regression models adjusted for age in month, site of enrollment and for confounding covariates where applicable; P-values could not be calculated for variables where both groups were zero, thus left blank.
- Underweight defined as weight for age <-2SD of the median age-sex specific WHO reference.
- Premature birth defined as gestational age <37 weeks.
- Abnormal Chest X-ray defined as radiographically confirmed end point pneumonia consolidation or any infiltrates.
- A child was considered to be hypoxic if 1) a room air pulse-oximetry reading indicated oxygen saturation <90% at the two sites at elevation (Zambia and South Africa) or <92% at all other sites, or 2) a room air oxygen saturation.
- Tachycardia defined as heart rate >160 beats per minute (bpm) if aged <11 months, heart rate >150 bpm if aged 12-35 months, heart rate >140 bpm if aged 36-59 months.
- Tachypnea defined as respiratory rate >60 breaths/minute if aged <2 months, respiratory rate >50 breaths/minute if aged 2-12 months, respiration rate >40 breaths/minute if aged >12 month.
- Fever defined as temperature >38oC.
- Leucocytosis defined as white blood cell count >15 000 cells/uL if age <12 months, white blood cell count >13 000 cells/uL if age >12 months.
- CRP defined as levels ≥40mg/mL which are considered to potentially indicate bacterial infection.
- Blood culture positive for any non-contaminate bacteria.

- m. MCPD defined when *s. pneumoniae* was cultured from a normally sterile body fluid - blood, pleural fluid or lung aspirate - or pleural fluid or lung aspirate was PCR *LytA*.

**Table S5:** Rhinovirus-Positive Pneumonia Cases (N=912) and Controls (N=1056) overall, by site of enrolment and age group

|                                     | Numbers   |              | Percent   |              | aOR <sup>a</sup> | 95% CI <sup>a</sup> | P-value <sup>a</sup> |
|-------------------------------------|-----------|--------------|-----------|--------------|------------------|---------------------|----------------------|
|                                     | RV+ Cases | RV+ Controls | RV+ Cases | RV+ Controls |                  |                     |                      |
| <b>Overall</b>                      | 912       | 1056         | 24        | 21           | 1.5              | 1.3-1.6             | <0.001               |
| <b>Mono-infections<sup>b</sup></b>  | 481       | 656          | 12        | 13           | 0.9              | 0.8-1.0             | 0.136                |
| <b>Mixed infections<sup>c</sup></b> | 431       | 400          | 13        | 9            | 1.4              | 1.2-1.6             | >0.001               |
| <b>Age categories</b>               |           |              |           |              |                  |                     |                      |
| <b>1-5 months</b>                   | 324       | 391          | 21        | 25           | 0.8              | 0.7-0.9             | 0.01                 |
| <b>6-11 months</b>                  | 195       | 256          | 22        | 22           | 1.0              | 0.8-1.2             | 0.94                 |
| <b>12-59 months</b>                 | 393       | 409          | 28        | 18           | 2.1              | 1.8-2.5             | 0.03                 |
| <b>Site of enrolment</b>            |           |              |           |              |                  |                     |                      |
| <b>Kenya</b>                        | 152       | 162          | 24        | 19           | 1.8              | 1.4-2.4             | <0.001               |
| <b>Gambia</b>                       | 139       | 177          | 23        | 28           | 0.9              | 0.7-1.2             | 0.6                  |
| <b>South Africa</b>                 | 182       | 194          | 23        | 24           | 1.0              | 0.8-1.2             | 0.843                |
| <b>Mali</b>                         | 112       | 143          | 17        | 19           | 1.2              | 0.8-1.6             | 0.326                |
| <b>Zambia</b>                       | 95        | 93           | 21        | 17           | 1.3              | 0.9-1.7             | 0.148                |
| <b>Thailand</b>                     | 40        | 92           | 18        | 14           | 1.5              | 1.0-2.3             | 0.05                 |
| <b>Bangladesh</b>                   | 192       | 195          | 37        | 25           | 2.0              | 1.6-2.6             | <0.001               |

Abbreviations - aOR: adjusted odds ratio; CI: confidence interval; RV: rhinovirus.

- P-values and aOR of being a RV+ cases compared to a RV+ control from regression models adjusted for age in month, site of enrollment, prematurity, sex, breastfeeding practices, co-infecting viruses and bacteria where applicable.
- RV was the only respiratory virus detected in the nasopharyngeal/oropharyngeal sample
- Any viral respiratory coinfection with RSV (A and B), HMPV, AdV, InFV (A, B and C), PIV type 1-4, HCoV (OC43, NL63, 229E and HKU1).

**Table S6:** Demographic, Clinical and Laboratory Findings of Rhinovirus-Positive Pneumonia Cases (N=912) and Controls (N=1056), All PERCH Sites.

|                                                      | Number    |              | Percent   |              | aOR <sup>a</sup> | 95%CI    | P-value |
|------------------------------------------------------|-----------|--------------|-----------|--------------|------------------|----------|---------|
|                                                      | RV+ cases | RV+ controls | RV+ cases | RV+ controls |                  |          |         |
| <u>Demographic and health:</u>                       |           |              |           |              |                  |          |         |
| Under weight <sup>b</sup>                            | 277       | 127          | 30        | 12           | 3.2              | 2.2-4.6  | <0.001  |
| Male                                                 | 539       | 538          | 59        | 51           | 1.5              | 1.1-1.9  | 0.01    |
| Never breast fed                                     | 83        | 77           | 9         | 7            | 1.3              | 0.9-1.9  | 0.12    |
| Smoker in household                                  | 340       | 392          | 37        | 37           | 1.1              | 0.9-1.3  | 0.55    |
| Day Care attendance                                  | 126       | 163          | 1         | 16           | 0.95             | 0.7-1.4  | 0.80    |
| 1-12 months of age <sup>c</sup>                      | 519       | 647          | 57        | 61           | 0.8              | 0.7-0.9  | 0.01    |
| Premature birth <sup>d</sup>                         | 22        | 17           | 3         | 2            | 0.8              | 0.6-1.1  | 0.19    |
| <u>RV epidemiology:</u>                              |           |              |           |              |                  |          |         |
| RV Co-infections <sup>e</sup>                        | 431       | 397          | 47        | 37           | 1.4              | 1.1-1.9  | 0.01    |
| RV Mono-infection <sup>f</sup>                       | 481       | 654          | 53        | 62           | 0.7              | 0.5-0.9  | 0.01    |
| <u>Respiratory viral co-infections in the NP/OP:</u> |           |              |           |              |                  |          |         |
| RSV                                                  | 121       | 24           | 13        | 2            | 4.4              | 2.3-8.4  | <0.001  |
| PIV                                                  | 76        | 68           | 8         | 6            | 1.4              | 0.96-1.9 | 0.08    |
| HBoV                                                 | 138       | 138          | 15        | 13           | 1.2              | 0.95-1.6 | 0.12    |
| HMPV                                                 | 49        | 57           | 5         | 5            | 1.1              | 0.7-1.6  | 0.81    |
| AdV                                                  | 108       | 134          | 12        | 13           | 0.9              | 0.7-1.2  | 0.62    |
| InFV A-C                                             | 5         | 9            | 1         | 1            | 0.6              | 0.2-1.9  | 0.42    |
| HCoV                                                 | 56        | 93           | 6         | 9            | 0.5              | 0.3-0.8  | 0.01    |
| <u>Bacterial infections in the NP/OP:</u>            |           |              |           |              |                  |          |         |
| <i>B. pertussis</i>                                  | 8         | 1            | 1         | 0            | 9.4              | 1.2-75.4 | 0.04    |
| <i>H. influenzae</i> type b                          | 23        | 23           | 3         | 2            | 1.2              | 0.6-2.1  | 0.61    |
| <i>S. aureus</i>                                     | 129       | 135          | 13        | 14           | 1.1              | 0.9-1.5  | 0.38    |
| <i>H. influenzae</i>                                 | 510       | 603          | 56        | 57           | 0.95             | 0.8-1.1  | 0.60    |
| <i>M. pneumoniae</i>                                 | 8         | 4            | 2         | 1            | 0.8              | 0.4-1.6  | 0.50    |
| <i>C. pneumoniae</i>                                 | 9         | 16           | 1         | 2            | 0.7              | 0.3-1.5  | 0.31    |
| <i>S. pneumoniae</i>                                 | 661       | 860          | 72        | 81           | 0.6              | 0.5-0.7  | <0.001  |
| <i>M. catarrhalis</i>                                | 616       | 836          | 68        | 79           | 0.5              | 0.4-0.7  | <0.001  |
| Any bacterial co-infection                           | 845       | 1015         | 93        | 96           | 0.5              | 0.3-0.8  | 0.001   |

Abbreviations - aOR: adjusted odds ratio; CI: confidence interval; SD: standard deviation; NP/OP nasopharyngeal/oropharyngeal; RV: rhinovirus; RSV: respiratory syncytial Virus, HMPV: human metapneumovirus; AdV: adenovirus; PIV: parainfluenza type 1-4; HBoV: human bocavirus; HCoV: human coronavirus (OC43, NL63, 229E and HKU1) and InFV: influenza Virus (A, B and C).

- P-values and aOR of being a RV+ cases compared to a RV+ control from regression models adjusted for age in month, site of enrollment, prematurity, sex, breastfeeding practices, co-infecting viruses and bacteria where applicable.
- Underweight defined as weight for age <-2SD of the median age-sex specific WHO reference.
- The mean age and standard deviation (SD) for RV cases (13.1 months; SD:12.1) and RV+ controls (13.2 months; SD:12.9; P=0.56).
- Premature birth defined as gestational age <37 weeks.
- Any viral respiratory coinfection with RSV (A and B), HMPV, AdV, InFV (A, B and C), PIV type 1-4, HCoV (OC43, NL63, 229E and HKU1).
- RV was the only respiratory virus detected in the nasopharyngeal/oropharyngeal sample

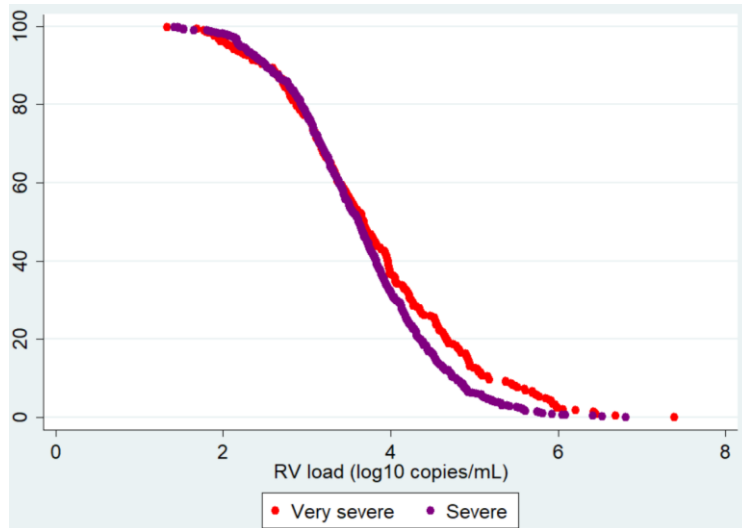

**Figure S1:** Reverse Cumulative Plot of RV Viral Load in the Nasopharyngeal/Oropharyngeal Sample among Very Severe and Severe Pneumonia Cases. The Viral Loads of Very Severe Cases Are Shown in Red and the Severe Cases in Purple.

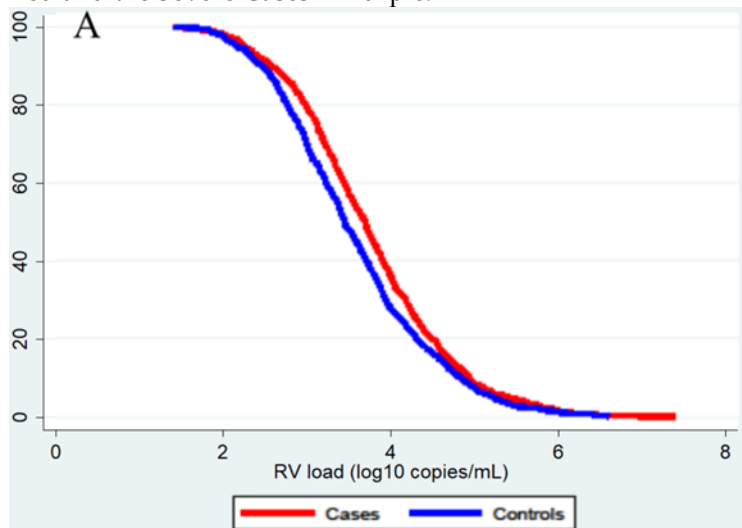

**Figure S2:** Reverse Cumulative Plot of RV Viral Load in the Nasopharyngeal/Oropharyngeal Sample among Cases and Controls. The Viral Loads of Cases Are Shown in Red and the Controls in Blue.
